# Supplementary material for: Age-dependent change of coalitionary strategy in male Barbary macaques
Source: PubMed Central journal article supplement (PMC7041515; doi:10.5194/pb-4-1-2017), 2017-01-26
Supplement: pb-4-1-supplement.pdf [file pb-4-1-supplement.pdf]

Supplement of Primate Biol., 4, 1–7, 2017  
<http://www.primate-biol.net/4/1/2017/>  
doi:10.5194/pb-4-1-2017-supplement  
© Author(s) 2017. CC Attribution 3.0 License.

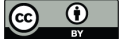

Primate  
Biology  Open Access

*Supplement of*

## **Age-dependent change of coalitionary strategy in male Barbary macaques**

**Eva-Maria Rathke et al.**

*Correspondence to:* Eva-Maria Rathke (erathke@dpz.eu)

The copyright of individual parts of the supplement might differ from the CC-BY 3.0 licence.

| data_year | ID   | coalitions |
|-----------|------|------------|
| 2006      | c_13 | 27         |
| 2006      | c_5  | 4          |
| 2006      | d_10 | 8          |
| 2006      | d_11 | 5          |
| 2006      | d_13 | 15         |
| 2006      | d_25 | 14         |
| 2006      | d_27 | 18         |
| 2006      | d_29 | 15         |
| 2006      | e_13 | 8          |
| 2006      | e_14 | 11         |
| 2006      | f_3  | 16         |
| 2006      | g_4  | 17         |
| 2006      | h_3  | 9          |
| 2006      | i_2  | 3          |
| 2006      | j_3  | 7          |
| 2006      | l_1  | 1          |
| 2006      | m_1  | 1          |
| 2006      | n_1  | 0          |
| 2006      | n_2  | 0          |
| 2006      | o_2  | 2          |
| 2006      | o_3  | 0          |
| 2006      | q_7  | 0          |
| 2006      | y_2  | 17         |
| 2006      | z_30 | 12         |
| 2008      | y_2  | 13         |
| 2008      | z_30 | 12         |
| 2008      | c_5  | 16         |
| 2008      | c_13 | 21         |
| 2008      | d_10 | 11         |
| 2008      | d_11 | 9          |
| 2008      | d_13 | 6          |
| 2008      | d_25 | 16         |
| 2008      | d_29 | 30         |
| 2008      | e_13 | 16         |
| 2008      | e_14 | 21         |
| 2008      | f_3  | 19         |
| 2008      | g_4  | 15         |
| 2008      | h_3  | 31         |
| 2008      | i_2  | 10         |
| 2008      | j_3  | 25         |
| 2008      | l_1  | 8          |
| 2008      | m_1  | 6          |
| 2008      | n_1  | 0          |
| 2008      | n_2  | 5          |
| 2008      | o_2  | 1          |
| 2008      | o_3  | 1          |
| 2008      | q_7  | 8          |
| 2014      | h_3  | 21         |
| 2014      | i_2  | 7          |

|      |     |    |
|------|-----|----|
| 2014 | j_3 | 33 |
| 2014 | l_1 | 8  |
| 2014 | m_1 | 4  |
| 2014 | n_1 | 5  |
| 2014 | n_2 | 8  |
| 2014 | o_2 | 5  |
| 2014 | q_7 | 13 |
| 2014 | u_1 | 2  |
| 2014 | w_1 | 0  |
| 2014 | w_4 | 1  |
| 2014 | y_3 | 3  |
| 2014 | z_1 | 4  |
| 2014 | z_3 | 12 |
| 2014 | a_1 | 11 |
| 2014 | b_3 | 2  |
| 2014 | b_4 | 3  |
